# Supplementary material for: Including metabolite concentrations into flux balance analysis: thermodynamic realizability as a constraint on flux distributions in metabolic networks
Source: PubMed Central journal article supplement (PMC1903363; doi:10.1186/1752-0509-1-23), 2007-06-01
Supplement: 1752-0509-1-23-S3.pdf [file 1752-0509-1-23-S3.pdf]

# Formal proof the the concept of thermodynamic realizability implies the generalization of Kirchhoff's loop law for metabolic networks

Andreas Hoppe<sup>\*1</sup>, Sabrina Hoffmann<sup>1</sup> and Hermann-Georg Holzhütter<sup>\*1</sup>

<sup>1</sup>Charité – University Medicine Berlin, Institute for Biochemistry, Universitätsmedizin Berlin, Monbijoustr. 2, 10117 Berlin, Germany

Email: Andreas Hoppe - andreas.hoppe@charite.de; Hermann-Georg Holzhütter - hergo@charite.de;

\*Corresponding author

Changes of the standard Gibb's energies of reactions  $\Delta_r G_0$  can be expressed through changes of the standard Gibb's energies of the formation  $\Delta_f G$  of their reactants [1]:

$$\overline{\Delta_r G_0} = \mathbf{S} \overline{\Delta_f G} \quad (1)$$

A particular set of values standard Gibb's reaction energies are called well-formed if they satisfy this property.

The following proposition relates thermodynamic realizability to the generalization of Kirchhoff's loop law [2]:

**Proposition.** Let the standard Gibb's reaction energy changes of a metabolic system be well-formed and let a flux vector  $V$  be thermodynamically realizable. Then the flux vector  $V$  satisfies the generalization of Kirchhoff's loop law which means that for every closed loop the net flux is zero.

**Proof.** A closed loop is characterized by a set of (reaction) indices  $I$  and coefficients  $\nu_i, i \in I$  which satisfy  $\sum_{i \in I} \nu_i \mathbf{S}_i = \bar{\mathbf{0}}^T$  where  $\mathbf{S}_i$  denotes the  $i$ -th row of the stoichiometric matrix  $\mathbf{S}$  and  $\bar{\mathbf{0}}^T$  denotes a zero row vector.

For a closed loop the sum of the respective changes of standard Gibb's energies is zero, e.g.

$$\sum_{i \in I} \nu_i \Delta_r G_0^{(i)} = 0 \quad (2)$$

This is an immediate consequence of the well-formedness of the Gibb's reaction energies, see formula (1).

For the actual Gibb's energy changes we conclude:

$$\sum_{i \in I} \nu_i \Delta_r G^{(i)} = \sum_{i \in I} \nu_i (\Delta_r G_0^{(i)} + \mathbf{S}_i \mathbf{C}) = \sum_{i \in I} \nu_i \Delta_r G_0^{(i)} + \sum_{i \in I} \nu_i \mathbf{S}_i \mathbf{C} = \left( \sum_{i \in I} \nu_i \mathbf{S}_i \right) \mathbf{C} = \bar{\mathbf{0}}^T \mathbf{C} = 0 \quad (3)$$

It follows that the vector  $(\nu_i \Delta_r G^{(i)})_{i \in I}$  is neither completely positive nor completely negative. So is the vector  $(\nu_i v_i)_{i \in I}$ , by the directionality law. This is equivalent with the statement that this loop carries no net flux. q.e.d.

## References

1. Alberty R: *Thermodynamics of Biochemical Reactions*. Hoboken, NJ: Wiley & Sons 2003.
2. Price N, Famili I, Beard D, Palsson B: **Extreme pathways and Kirchhoff's second law**. *Biophys J* 2002, **83**(5):2879–2882.
